# Supplementary material
Source: PubMed Central journal article supplement (PMC4150063)
Supplement: supp_127.17.3782_JCS149849.pdf [file supp_127.17.3782_JCS149849.pdf]

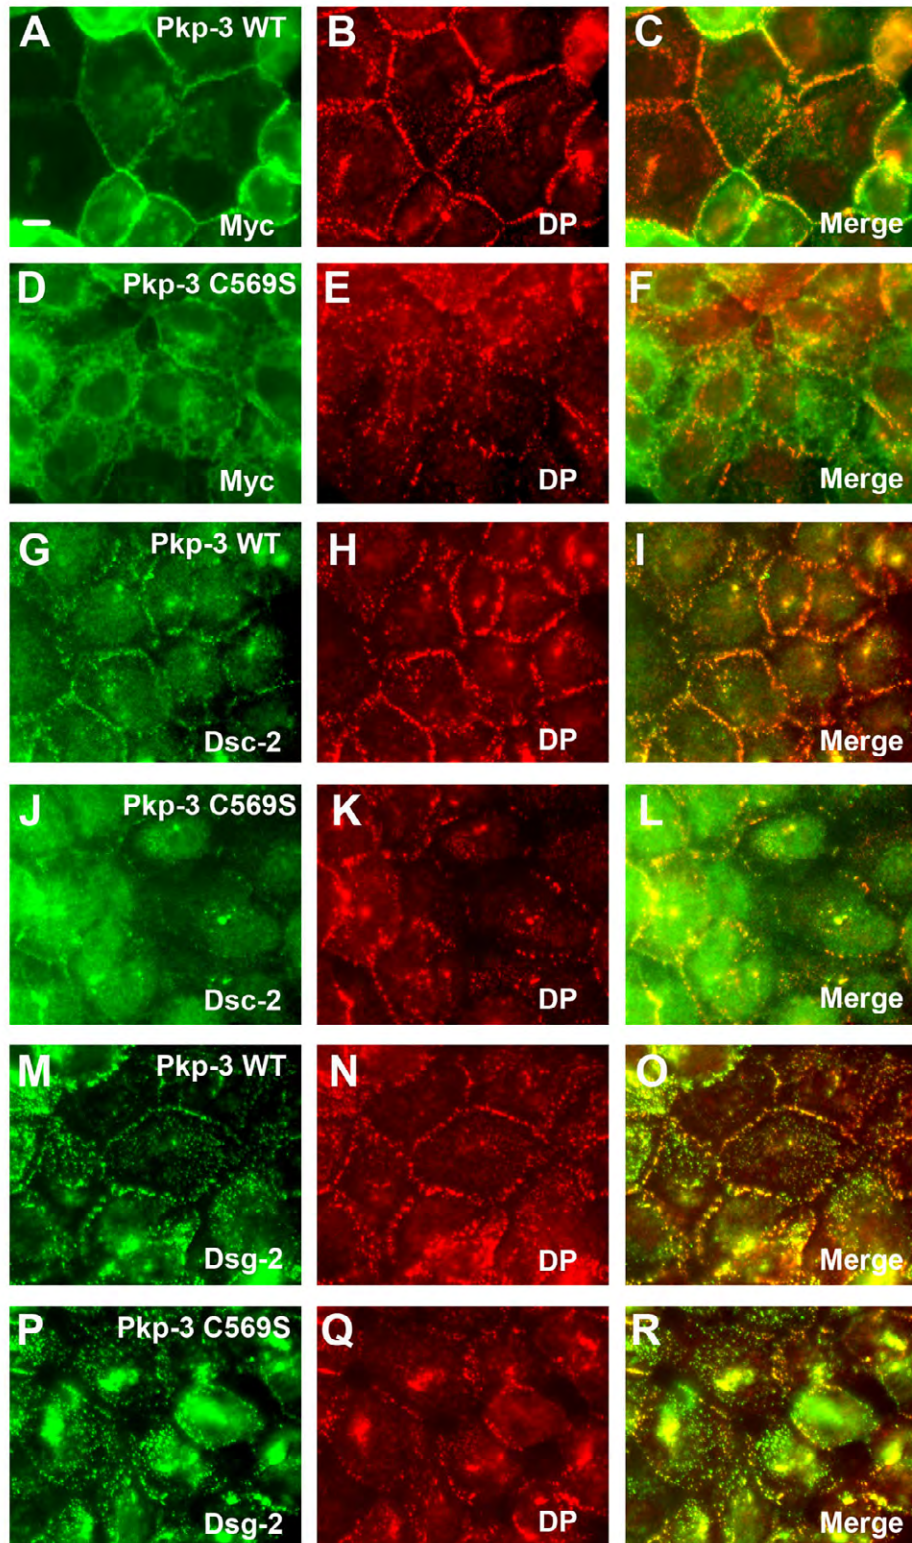

**Figure S1. Palmitoylation defective plakophilin-3 disrupts endogenous desmosomal component localization.** A431 cells expressing wild-type plakophilin-3 (panels A-C, G-I and M-O) or plakophilin-3 C569S (panels D-F, J-L, and P-R) were grown on glass coverslips, fixed and immunostained using antibodies recognizing the myc epitope tag (panels A and D), desmocollin-2 (panels G and J) and desmoglein-2 (panels M and P). Desmoplakin co-localization is shown in panels B, E, H, K, N and Q. The bar in panel A represents 10  $\mu$ m.
